# Supplementary material
Source: MDPI journal article supplement (https://www.mdpi.com/2673-4079/3/1/7)
Supplement: s1 [file s1]

# Supplementary Materials

## Valorization of Hazardous Organic Solid Wastes towards Fuels and Chemicals via Fast (Catalytic) Pyrolysis

Kyriazis C. Rekos <sup>1,2</sup>, Ioannis D. Charisteidis <sup>1</sup>, Evangelos Tzamos <sup>3</sup>, Georgios Palantzas <sup>4</sup>,  
Anastasios I. Zouboulis <sup>1</sup> and Konstantinos S. Triantafyllidis <sup>1,2,\*</sup>

<sup>1</sup> Department of Chemistry, Aristotle University of Thessaloniki, 54124 Thessaloniki, Greece;  
rkyriazi@chem.auth.gr (K.C.R.); icharisteidis@gmail.com (I.D.C.);  
zoubouli@chem.auth.gr (A.I.Z.)

<sup>2</sup> Center for Interdisciplinary Research and Innovation (CIRI-AUTH), Aristotle University of Thessaloniki, 57001 Thessaloniki, Greece

<sup>3</sup> R & D Department, North Aegean Slops S.A., 26 Oktovriou Str. 42, 54627 Thessaloniki, Greece;  
tzamos@chem.auth.gr

<sup>4</sup> Department of Civil Engineering, Faculty of Engineering, Aristotle University of Thessaloniki,  
54124 Thessaloniki, Greece; palantzas@civil.auth.gr

\* Correspondence: ktrianta@chem.auth.gr

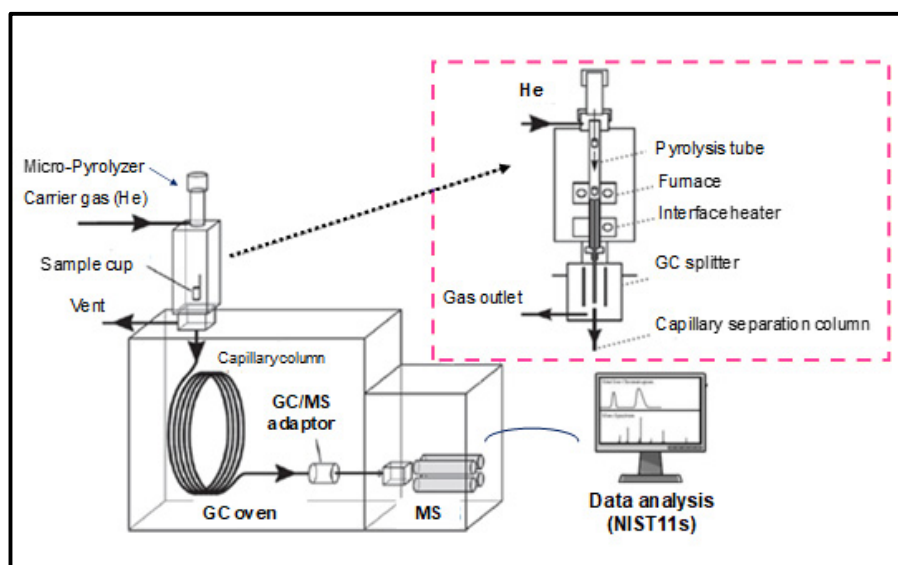

**Figure S1.** Schematic representation of the Py/GC-MS system.

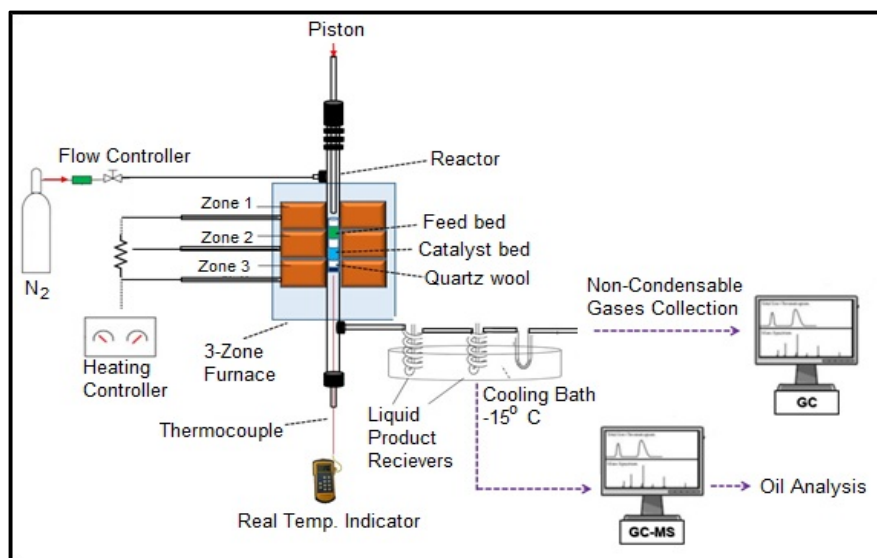

**Figure S2.** Schematic representation of bench-scale fixed bed reactor for fast pyrolysis of solid wastes.

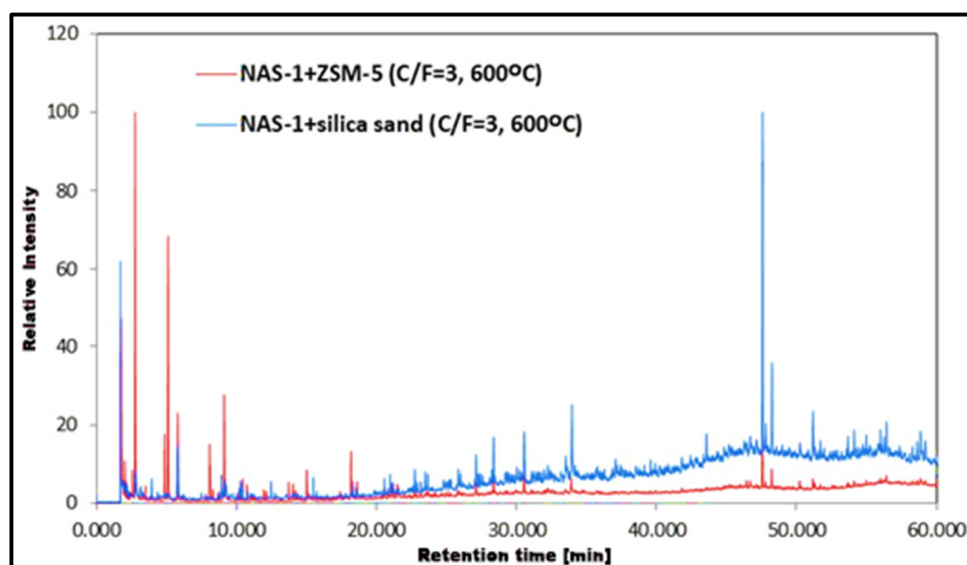

**Figure S3.** Representative Py/GC-MS spectra of the non-catalytic (thermal) and catalytic fast pyrolysis of NAS-1 at  $600^\circ\text{C}$ .

**Table S1.** Waste materials physicochemical properties.

| Waste material type                    | Water Content<br>(% wt.) | Ash (% wt.)<br>[on dry base] |
|----------------------------------------|--------------------------|------------------------------|
| Petroleum containing sludges (NAS-1)   | 44.5                     | 73.6                         |
| Residual paint on scrap metals (NAS-2) | 3.6                      | 30.4                         |
| Creosote treated wood waste (NAS-3)    | 9                        | 1.5                          |

**Table S2.** Composition of the ash of the three waste feeds.

| Composition<br>(%<br>elemental<br>ratio) | NAS-1 | NAS-2 | NAS-3 | Composition<br>(%<br>elemental<br>ratio) | NAS-1 | NAS-2 | NAS-3 |
|------------------------------------------|-------|-------|-------|------------------------------------------|-------|-------|-------|
| Na                                       | 1.4   | 2.3   | 3.2   | S                                        | 1.3   | 0.6   | 16.4  |
| Mg                                       | 4.9   | -     | 6     | K                                        | 2.2   | 3.3   | 5.7   |
| Al                                       | 10.1  | 6.3   | 7.6   | Ca                                       | 31.9  | 67.6  | 46.3  |
| Si                                       | 28.7  | 13.6  | 9.6   | Ti                                       | 0.9   | 6.3   | -     |
| P                                        | 1.2   | -     | -     | Fe                                       | 17.6  | -     | 5.2   |

**Table S3.** Elemental analysis of waste materials (normalized values<sup>(1)</sup>).

| Waste | C<br>(% w.t.) | H<br>(% w.t.) | N<br>(% w.t.) | S<br>(% w.t.) | O<br>(% w.t.)        |
|-------|---------------|---------------|---------------|---------------|----------------------|
| NAS-1 | 57.85         | 5.08          | 1.35          | 4.23          | 31.50 <sup>(2)</sup> |
| NAS-2 | 69.80         | 8.86          | 0.14          | 0.65          | 21.12                |
| NAS-3 | 51.14         | 5.73          | 0.96          | 5.69          | 36.49                |

(1) Normalized values (Vn) have been estimated from the following equation considering the ash content (wt.%) of each solid waste:  $Vn = a \times [100 / ((100 - y))]$ , where  $a$  is the initial value from elemental analysis and  $y$  is the ash content (wt.%).

(2) The O content values for the petroleum sludge might be overestimated due to the very high content of ash (hydroxy-oxides).

**Table S4.** FT-IR peaks identification for the solid waste materials.

| Wavenumber (cm <sup>-1</sup> ) | Chemical bond type                                                            | Waste material |
|--------------------------------|-------------------------------------------------------------------------------|----------------|
| 3622                           | O-H, alcohol or O-H humidity                                                  | NAS-1          |
| 3450                           | O-H, Alcohol                                                                  | NAS-2          |
| 3325                           | O-H, Alcohol                                                                  | NAS-3          |
| 3300                           | carboxylic acid                                                               | NAS-2          |
| 3050                           | Alcohol                                                                       | NAS-3          |
| 2960                           | CH <sub>3</sub> , asym. stretching, alkane                                    | NAS-2          |
| 2925                           | CH <sub>2</sub> , asym. stretching, alkane                                    | NAS-1, NAS-3   |
| 2875                           | CH <sub>3</sub> , sym. stretching, alkane                                     | NAS-2          |
| 2850                           | CH <sub>2</sub> sym. stretching, alkane or O-H alcohol intramolecular bonding | NAS-1, NAS-3   |
| 2510                           | S-H stretching thiol                                                          | NAS-1, NAS-2   |
| 2350                           | C=O from atmospheric CO <sub>2</sub>                                          | NAS-2, NAS-3   |
| 1800                           | acid halide or C-H bending, aromatic compound                                 | NAS-1          |
| 1730                           | C=O, stretching, aldehyde or ester                                            | NAS-2          |
| 1660                           | C=C, stretching, alkenes                                                      | NAS-2          |
| 1600                           | C=O stretching, coniferyl/sinapyl aldehydes in lignin                         | NAS-3          |
| 1600                           | Aromatic C=C sym. stretching in lignin                                        | NAS-3          |
| 1515                           | Aromatic C=C asym. stretching in lignin                                       | NAS-3          |
| 1450                           | CH <sub>2</sub> , bending, alkane                                             | NAS-2, NAS-3   |
| 1450                           | Asymmetric C-H deformation, lignin                                            | NAS-3          |
| 1425                           | CH <sub>2</sub> +CH <sub>3</sub> bending, alkane                              | NAS-1          |
| 1380                           | Sulfate                                                                       | NAS-3          |
| 1275                           | C-O stretching in (aromatic) esters                                           | NAS-2, NAS-3   |
| 1150                           | C-O, stretching, ether or alcohol                                             | NAS-2          |
| 1065                           | primary alcohol                                                               | NAS-2          |
| 1025                           | C-O-C stretching of primary alcohol in cellulose and hemicellulose            | NAS-3          |
| 1025                           | Si-O-Si stretching, clays                                                     | NAS-1          |
| 875                            | C-H bending, 1,2,4 trisubstituted                                             | NAS-1, NAS-2   |

|     |                                       |       |
|-----|---------------------------------------|-------|
|     | CaCO <sub>3</sub>                     | NAS-2 |
| 800 | C-H bending, 1,2,3,4 tetrasubstituted | NAS-1 |
| 750 | monosubstituted                       | NAS-3 |
| 715 | C-H bending, aromatic                 | NAS-2 |

**Table S5.** Composition of bio-oil derived from non-catalytic fast pyrolysis of petroleum sludge (NAS-1) in the Py/GC-MS system, at 600°C (GC-MS peak area, %).

| <i>Compound</i>                       | <i>Group</i> | <i>%</i> | <i>Compound</i>                             | <i>Group</i> | <i>%</i> |
|---------------------------------------|--------------|----------|---------------------------------------------|--------------|----------|
| 1-Butanol                             | AL           | 0.32     | 2-methylhexacosane                          | ALI          | 0.82     |
| Methyl methacrylate                   | EST          | 0.72     | 9-Hexadecenoic acid, eicosyl ester, (Z)-    | EST          | 0.44     |
| Toluene                               | AR           | 4.79     | Bicyclo[4.2.0]octa-1,3,5-triene             | AR           | 3.39     |
| Styrene                               | AR           | 7.87     | 1,6-Octadiene, 2,7-dimethyl-                | ALI          | 0.44     |
| 1-Nonene                              | ALI          | 1.97     | Cyclohexene, 1-methyl-5-(1-methylethenyl)-  | ALI          | 0.55     |
| .alpha.-Methylstyrene                 | AR           | 1.35     | 2-Pentene, 2,4,4-trimethyl-                 | ALI          | 0.50     |
| 2-Butenoic acid, butyl ester          | EST          | 1.98     | Tridecane                                   | ALI          | 0.41     |
| Phenol                                | PH           | 0.66     | Dodecane, 2,6,10-trimethyl-                 | ALI          | 2.17     |
| 1-Decene                              | ALI          | 2.30     | 1-Tetradecene                               | ALI          | 0.96     |
| D-Limonene                            | ALI          | 1.66     | Tetradecane                                 | ALI          | 0.46     |
| 2,4,4,6,6,8,8-Heptamethyl-2-nonene    | ALI          | 0.62     | 2-Ethyl-1-dodecanol                         | AL           | 0.53     |
| 1-Undecene                            | ALI          | 1.56     | Pentadecane                                 | ALI          | 0.82     |
| 1-Dodecene                            | ALI          | 2.19     | Pentadecane, 3-methyl-                      | ALI          | 0.44     |
| 1-Tridecene                           | ALI          | 2.46     | Cetene                                      | ALI          | 0.88     |
| 1-Pentadecene                         | ALI          | 1.42     | Hexacosane                                  | ALI          | 0.73     |
| 1-Heptadecene                         | ALI          | 0.71     | Pentadecane, 2,6,10-trimethyl-              | ALI          | 2.19     |
| Phenol, 2,6-dimethoxy-4-(2-propenyl)- | OxyPH        | 0.86     | Tridecane, 4-cyclohexyl-                    | ALI          | 0.57     |
| n-Dodecyl methacrylate                | ALI          | 0.53     | Hexadecane, 4-methyl-                       | ALI          | 0.69     |
| 1-Heneicosanol                        | AL           | 0.53     | Tetratetracontane                           | ALI          | 0.60     |
| Heneicosane                           | ALI          | 3.35     | Heptadecane                                 | ALI          | 0.76     |
| Heptadecanal                          | ALD          | 0.54     | Pentadecane, 2,6,10,14-tetramethyl-         | ALI          | 3.51     |
| Octacosane                            | ALI          | 1.39     | Hexadecane, 2,6,10,14-tetramethyl-          | ALI          | 4.74     |
| n-Nonadecanol-1                       | AL           | 1.29     | Carbonic acid, propargyl 2-ethylhexyl ester | EST          | 0.72     |
| 1-Decanol, 2-hexyl-                   | AL           | 2.64     | Octadecane, 3-methyl-                       | ALI          | 0.61     |
| Nonadecane, 4-methyl-                 | ALI          | 0.34     | Octadecanoic acid, 2-propenyl ester         | EST          | 1.10     |
| Heneicosane, 3-methyl-                | ALI          | 0.91     | Cyclohexane, (1-hexyltetradecyl)-           | ALI          | 0.56     |
| Docosane                              | ALI          | 1.31     | 2-methyltetracosane                         | ALI          | 0.56     |

|                                      |            |      |                                                                                     |            |      |
|--------------------------------------|------------|------|-------------------------------------------------------------------------------------|------------|------|
| Pentatriacontane                     | <b>ALI</b> | 5.10 | Hexadecanoic acid, 1-(hydroxymethyl)-1,2-ethanediyl ester                           | <b>EST</b> | 0.73 |
| Nonacosane                           | <b>ALI</b> | 1.11 | 13-Octadecenal, (Z)-                                                                | <b>ALD</b> | 0.29 |
| Eicosane                             | <b>ALI</b> | 1.14 | 1,3-Benzenedicarboxylic acid, bis(2-ethylhexyl) ester                               | <b>EST</b> | 1.08 |
| 17-Pentatriacontene                  | <b>ALI</b> | 0.58 | Nonahexacontanoic acid                                                              | <b>AC</b>  | 0.98 |
| Dodecane, 4-cyclohexyl-              | <b>ALI</b> | 0.58 | 1,1,3,6-tetramethyl-2-(3,6,10,13,14-pentamethyl-3-ethyl-pentadecyl)cyclohexane      | <b>ALI</b> | 0.23 |
| Tetracosane                          | <b>ALI</b> | 0.74 | 17-(1,5-Dimethylhexyl)-10,13-dimethyl-                                              | <b>ALI</b> | 4.47 |
| Benzeneacetic acid, 4-tridecyl ester | <b>EST</b> | 0.73 | 2,3,4,7,8,9,10,11,12,13,14,15,16,17-tetradecahydro-1H-cyclopenta[a]phenanthren-3-ol |            |      |
| Tetracontane                         | <b>ALI</b> | 1.07 | Triacontane, 1-bromo-                                                               | <b>ALI</b> | 0.75 |
| Tetrapentacontane                    | <b>ALI</b> | 1.32 | Tetracontane-1,40-diol                                                              | <b>AL</b>  | 0.87 |
| Disulfide, di-tert-dodecyl           | <b>SUL</b> | 0.21 | 13-Methyl-Z-14-nonacosene                                                           | <b>ALI</b> | 0.46 |

**Table S6.** Composition of bio-oil derived from catalytic fast pyrolysis (with ZSM-5 zeolite as catalysts) of petroleum sludge (NAS-1) in the Py/GC-MS system, at 600°C (GC-MS peak area, %).

| <i>Compound</i>                    | <i>Group</i> | <i>%</i> | <i>Compound</i>                             | <i>Group</i> | <i>%</i> |
|------------------------------------|--------------|----------|---------------------------------------------|--------------|----------|
| Cyclopentene, 4-methyl-            | <b>ALI</b>   | 1.06     | Tetradecanoic acid                          | <b>AC</b>    | 0.24     |
| Benzene                            | <b>AR</b>    | 9.79     | Dotriacontyl heptafluorobutyrate            | <b>ALI</b>   | 0.49     |
| Cyclopentane, 1,3-dimethyl-        | <b>ALI</b>   | 0.67     | Tetrapentacontane, 1,54-dibromo-            | <b>ALI</b>   | 0.07     |
| Cyclopentene, 4,4-dimethyl-        | <b>ALI</b>   | 2.29     | n-Tetracosanol-1                            | <b>AL</b>    | 0.15     |
| Cyclohexane, methyl-               | <b>ALI</b>   | 0.40     | Oxalic acid, allyl octadecyl ester          | <b>EST</b>   | 0.16     |
| Cyclobutane, (1-methylethylidene)- | <b>ALI</b>   | 1.20     | Heptafluorobutyric acid, n-tetradecyl ester | <b>EST</b>   | 0.41     |
| Toluene                            | <b>AR</b>    | 18.13    | 2-Octadecyl-propane-1,3-diol                | <b>AL</b>    | 1.48     |
| Cyclopentene, 1,2,3-trimethyl-     | <b>ALI</b>   | 0.53     | Sulfurous acid, octadecyl 2-propyl ester    | <b>EST</b>   | 2.74     |
| Ethylbenzene                       | <b>AR</b>    | 3.35     | Cyclohexene                                 | <b>ALI</b>   | 0.58     |
| Benzene, 1,3-dimethyl-             | <b>AR</b>    | 18.38    | 1-Hexene, 5-methyl-                         | <b>ALI</b>   | 0.51     |
| o-Xylene                           | <b>AR</b>    | 2.49     | Cyclopentene, 1,5-dimethyl-                 | <b>ALI</b>   | 0.40     |
| Benzene, propyl-                   | <b>AR</b>    | 0.34     | Cyclopentane, ethyl-                        | <b>ALI</b>   | 0.07     |
| Benzene, 1-ethyl-2-methyl-         | <b>AR</b>    | 2.30     | Cyclohexene, 4-methyl-                      | <b>ALI</b>   | 0.12     |
| Benzene, 1,2,4-trimethyl-          | <b>AR</b>    | 2.92     | 1,3,5-Hexatriene, 3-methyl-, (Z)-           | <b>ALI</b>   | 0.08     |
| Benzonitrile                       | <b>NIT</b>   | 0.38     | 1,3-Dimethyl-1-cyclohexene                  | <b>ALI</b>   | 0.30     |
| Indane                             | <b>AR</b>    | 1.24     | Octane, 3-methyl-                           | <b>ALI</b>   | 0.11     |

|                                     |            |      |                                                       |            |      |
|-------------------------------------|------------|------|-------------------------------------------------------|------------|------|
| Indene                              | <b>AR</b>  | 1.09 | Azulene                                               | <b>ALI</b> | 1.05 |
| 1-Phenyl-1-butene                   | <b>PH</b>  | 0.25 | Dodecane, 2,6,10-trimethyl-                           | <b>ALI</b> | 0.28 |
| 2,4-Dimethylstyrene                 | <b>AR</b>  | 0.36 | Hexadecane                                            | <b>ALI</b> | 0.27 |
| 1H-Indene, 2,3-dihydro-4-methyl-    | <b>AR</b>  | 0.55 | Benzene, 1-ethyl-3-methyl-                            | <b>AR</b>  | 2.41 |
| 1H-Indene, 3-methyl-                | <b>AR</b>  | 1.28 | Benzene, 1,2,3-trimethyl-                             | <b>AR</b>  | 3.28 |
| 1H-Indene, 1-methyl-                | <b>AR</b>  | 0.37 | Benzene, 1,4-diethyl-                                 | <b>AR</b>  | 0.12 |
| Naphthalene, 1,2,3,4-tetrahydro-    | <b>PAH</b> | 0.29 | Benzene, 1-methyl-4-propyl-                           | <b>AR</b>  | 0.14 |
| Naphthalene                         | <b>PAH</b> | 1.34 | Benzene, 1-methyl-2-(2-propenyl)-                     | <b>AR</b>  | 0.23 |
| 1H-Indene, 1,1-dimethyl-            | <b>AR</b>  | 0.10 | Benzene, 1-ethenyl-4-ethyl-                           | <b>AR</b>  | 0.38 |
| Naphthalene, 2-methyl-              | <b>PAH</b> | 2.41 | 1H-Indene, 2,3-dihydro-5-methyl-                      | <b>AR</b>  | 0.53 |
| Dodecane, 2,6,11-trimethyl-         | <b>ALI</b> | 0.20 | 2-Methylindene                                        | <b>AR</b>  | 0.35 |
| Naphthalene, 1-ethyl-               | <b>PAH</b> | 0.54 | 1H-Indene, 2,3-dihydro-4,7-dimethyl-                  | <b>AR</b>  | 0.12 |
| Naphthalene, 1,7-dimethyl-          | <b>PAH</b> | 1.21 | Biphenyl                                              | <b>AR</b>  | 0.12 |
| Naphthalene, 2,3-dimethyl-          | <b>PAH</b> | 0.36 | 1,3-Benzenedicarboxylic acid, bis(2-ethylhexyl) ester | <b>EST</b> | 0.20 |
| Naphthalene, 1,5-dimethyl-          | <b>PAH</b> | 0.23 | Tricyclo[3.1.0.0(2,4)]hex-3-ene-3-carbonitrile        | <b>NIT</b> | 0.37 |
| Hexadecane, 2,6,10,14-tetramethyl-  | <b>ALI</b> | 1.78 | Naphthalene, 1-methyl-                                | <b>PAH</b> | 1.35 |
| Eicosanoic acid                     | <b>AC</b>  | 0.18 | Naphthalene, 1,8-dimethyl-                            | <b>PAH</b> | 0.39 |
| Pentadecane, 2,6,10-trimethyl-      | <b>ALI</b> | 0.78 | Naphthalene, 2,6-dimethyl-                            | <b>PAH</b> | 0.25 |
| Pentadecane, 2,6,10,14-tetramethyl- | <b>ALI</b> | 1.35 | Naphthalene, 2,3,6-trimethyl-                         | <b>PAH</b> | 0.12 |

**Table S7.** Composition of bio-oil derived from non-catalytic fast pyrolysis of creosote-impregnated wood (NAS-3) in the Py/GC-MS system, at 600°C (GC-MS peak area, %).

| <i>Compound</i>                 | <i>Group</i> | <i>%</i> | <i>Compound</i>                                         | <i>Group</i> | <i>%</i> |
|---------------------------------|--------------|----------|---------------------------------------------------------|--------------|----------|
| 1,3,5-Hexatriene                | <b>ALI</b>   | 0.11     | 11H-Benzo[a]carbazole                                   | <b>NIT</b>   | 0.41     |
| 1-Hydroxy-2-butanone            | <b>KET</b>   | 0.09     | 1-Phenyldibenzofuran                                    | <b>OxyAR</b> | 0.12     |
| Bicyclo[4.2.0]octa-1,3,5-triene | <b>AR</b>    | 0.29     | Naphtho[2,1,8,7-klmn]xanthene                           | <b>OxyAR</b> | 0.31     |
| Phenol                          | <b>PH</b>    | 0.51     | 1-Aminopyrene                                           | <b>NIT</b>   | 0.56     |
| Indene                          | <b>AR</b>    | 0.21     | Benz[a]anthracene, 7-methyl-                            | <b>PAH</b>   | 1.01     |
| Phenol, 2-methyl-               | <b>PH</b>    | 0.13     | Chrysene, 1-methyl-                                     | <b>PAH</b>   | 0.24     |
| Phenol, 3-methyl-               | <b>PH</b>    | 0.26     | 5,12-Naphthacenedione                                   | <b>PAH</b>   | 0.19     |
| Phenol, 2-methoxy-              | <b>OxyPH</b> | 1.75     | 10,11-Dihydro-10-hydroxy-2,3-dimethoxydibenz(b,f)oxepin | <b>AL</b>    | 0.38     |
| 2-Methylindene                  | <b>AR</b>    | 0.14     | Benz(a)anthracene-7,12-dione                            | <b>PAH</b>   | 0.50     |
| Creosol                         | <b>OxyPH</b> | 3.02     | Benz[e]acephenanthrylene                                | <b>PAH</b>   | 5.26     |
| 4-Hydroxy-3-methylacetophenone  | <b>OxyPH</b> | 1.61     | Perylene                                                | <b>PAH</b>   | 1.27     |
| Eugenol                         | <b>OxyPH</b> | 1.15     | Acetic acid                                             | <b>AC</b>    | 0.69     |

|                                               |              |       |                                                   |              |      |
|-----------------------------------------------|--------------|-------|---------------------------------------------------|--------------|------|
| Phenol, 2-methoxy-4-(1-propenyl)-, (Z)-       | <b>OxyPH</b> | 0.68  | N-Nitrosodimethylamine                            | <b>NIT</b>   | 0.32 |
| Acenaphthylene                                | <b>PAH</b>   | 0.41  | Furan, 2-methyl-                                  | <b>FUR</b>   | 0.14 |
| trans-Isoeugenol                              | <b>OxyPH</b> | 4.06  | Toluene                                           | <b>AR</b>    | 0.36 |
| Acenaphthene                                  | <b>PAH</b>   | 0.24  | Ethanol, 2-nitro-, propionate (ester)             | <b>NIT</b>   | 0.21 |
| Fluorene                                      | <b>PAH</b>   | 0.47  | Pentanal                                          | <b>ALD</b>   | 0.21 |
| 2-Propenal, 3-(4-hydroxy-3-methoxyphenyl)-    | <b>OxyPH</b> | 1.14  | Furfural                                          | <b>ALD</b>   | 0.24 |
| 4-((1E)-3-Hydroxy-1-propenyl)-2-methoxyphenol | <b>OxyPH</b> | 2.34  | Styrene                                           | <b>AR</b>    | 0.25 |
| Phenanthrene                                  | <b>PAH</b>   | 1.83  | 1,2-Cyclopentanedione                             | <b>KET</b>   | 0.49 |
| Anthracene                                    | <b>PAH</b>   | 1.08  | Oxazolidine, 2,2-diethyl-3-methyl-                | <b>NIT</b>   | 0.33 |
| p-Phenylbenzonitrile                          | <b>NIT</b>   | 0.25  | 1H-Indene, 1-chloro-2,3-dihydro-                  | <b>AR</b>    | 0.13 |
| 5H-Indeno[1,2-b]pyridine                      | <b>NIT</b>   | 0.58  | 1,2-Cyclopentanedione, 3-methyl-                  | <b>KET</b>   | 0.64 |
| 1H-Cyclopropa[1]phenanthrene, 1a,9b-dihydro-  | <b>AR</b>    | 0.11  | Phenol, 4-ethyl-2-methoxy-                        | <b>OxyPH</b> | 0.27 |
| Phenanthrene, 3-methyl-                       | <b>PAH</b>   | 0.14  | 2-Methoxy-4-vinylphenol                           | <b>OxyPH</b> | 1.95 |
| 4H-Cyclopenta[def]phenanthrene                | <b>PAH</b>   | 0.48  | Vanillin                                          | <b>OxyPH</b> | 0.44 |
| 9,10-Anthracenedione                          | <b>PAH</b>   | 0.38  | Biphenylene                                       | <b>AR</b>    | 0.17 |
| Cyclopenta(def)phenanthrenone                 | <b>OxyAR</b> | 0.52  | Apocynin                                          | <b>OxyPH</b> | 0.36 |
| Pyrene                                        | <b>PAH</b>   | 15.45 | 2-Propanone, 1-(4-hydroxy-3-methoxyphenyl)-       | <b>OxyPH</b> | 0.18 |
| Phenaleno[1,9-bc]thiophene                    | <b>SUL</b>   | 0.16  | Dibenzo[b,e]7,8-diazabicyclo[2.2.2]octa-2,5-diene | <b>NIT</b>   | 0.69 |
| Benzo[b]naphtho[2,3-d]furan                   | <b>FUR</b>   | 3.58  | Benzo[h]quinoline                                 | <b>NIT</b>   | 0.27 |
| Indeno(1,2,3-ij)isoquinoline                  | <b>NIT</b>   | 0.81  | Anthracene, 9-methyl-                             | <b>PAH</b>   | 0.42 |
| 11H-Benzo[a]fluorene                          | <b>PAH</b>   | 0.66  | Naphthalene, 2-phenyl-                            | <b>PAH</b>   | 0.32 |
| Pyrene, 1-methyl-                             | <b>PAH</b>   | 3.22  | n-Hexadecanoic acid                               | <b>AC</b>    | 0.20 |
| 11H-Benzo[b]fluorene                          | <b>PAH</b>   | 2.81  | Fluoranthene                                      | <b>PAH</b>   | 6.16 |
| 1H-Benzimidazole, 1-(1H-inden-2-yl)-          | <b>NIT</b>   | 0.07  | 9-Anthracenecarbonitrile                          | <b>NIT</b>   | 0.33 |
| 4H-Benz[de]anthracene, 5,6-dihydro-           | <b>PAH</b>   | 0.12  | 1-benzyl-3-methylnaphthalene                      | <b>PAH</b>   | 0.26 |
| 1,2,3,4-Tetrahydro-6-methylthio-9-acridinol   | <b>SUL</b>   | 0.14  | Pyrene, 4-methyl-                                 | <b>PAH</b>   | 0.24 |
| 11H-Benzo[a]fluoren-11-one                    | <b>KET</b>   | 1.81  | 7H-Benz[de]anthracen-7-one                        | <b>KET</b>   | 0.55 |
| Benzo[b]naphtho[2,3-d]thiophene               | <b>SUL</b>   | 2.29  | Triphenylene                                      | <b>PAH</b>   | 2.69 |
| Benzo[ghi]fluoranthene                        | <b>PAH</b>   | 0.81  | 11H-Indeno(1,2-b)quinoline                        | <b>PAH</b>   | 0.55 |
| Benzo[c]phenanthrene                          | <b>PAH</b>   | 1.79  | 9H-Cyclopenta[a]pyrene                            | <b>PAH</b>   | 0.17 |
| Benz[c]acridine                               | <b>PAH</b>   | 0.91  | Benzo(a)pyrene-4,5-dione                          | <b>PAH</b>   | 0.70 |
| Benz[a]anthracene                             | <b>PAH</b>   | 10.06 | Benzo[ghi]perylene                                | <b>PAH</b>   | 0.13 |



**Table S8.** Composition of bio-oil derived from catalytic fast pyrolysis (with ZSM-5 zeolite as catalysts) of creosote-impregnated wood (NAS-3) in the Py/GC-MS system, at 600°C (GC-MS peak area, %).

| <i>Compound</i>                         | <i>Group</i> | <i>%</i> | <i>Compound</i>                           | <i>Group</i> | <i>%</i> |
|-----------------------------------------|--------------|----------|-------------------------------------------|--------------|----------|
| 1,3-Cyclohexadiene                      | <b>ALI</b>   | 0.06     | Fluoranthene, 2-methyl-                   | <b>PAH</b>   | 0.29     |
| Benzene                                 | <b>AR</b>    | 3.20     | 11H-Benzo[b]fluorene                      | <b>PAH</b>   | 2.30     |
| Toluene                                 | <b>AR</b>    | 8.28     | Pyrene, 2-methyl-                         | <b>PAH</b>   | 0.40     |
| Ethylbenzene                            | <b>AR</b>    | 1.47     | 11H-Benzo[a]fluoren-11-one                | <b>KET</b>   | 1.12     |
| Benzene, 1,3-dimethyl-                  | <b>AR</b>    | 9.09     | Benzo[b]naphtho[2,3-d]thiophene           | <b>SUL</b>   | 1.19     |
| p-Xylene                                | <b>AR</b>    | 0.96     | Benzo[c]phenanthrene                      | <b>PAH</b>   | 1.11     |
| Benzene, 1-ethyl-2-methyl-              | <b>AR</b>    | 0.75     | Benz[c]acridine                           | <b>PAH</b>   | 0.56     |
| Benzene, 1,2,3-trimethyl-               | <b>AR</b>    | 2.31     | Benz[a]anthracene                         | <b>PAH</b>   | 4.75     |
| 3-Hydroxyphenylacetylene                | <b>PH</b>    | 0.44     | Benz[e]acephenanthrylene                  | <b>PAH</b>   | 1.59     |
| Benzene, 1-ethenyl-2-methyl-            | <b>AR</b>    | 0.29     | Benzo[k]fluoranthene                      | <b>PAH</b>   | 0.23     |
| Indane                                  | <b>AR</b>    | 1.73     | Benzo[j]fluoranthene                      | <b>AR</b>    | 0.22     |
| Indene                                  | <b>AR</b>    | 0.99     | 1H-Indenol                                | <b>AL</b>    | 0.16     |
| 1H-Indene, 2,3-dihydro-2-methyl-        | <b>AR</b>    | 0.23     | Phenanthrene, 9-methyl-                   | <b>ALI</b>   | 0.34     |
| Phenol, 2-methoxy-                      | <b>OxyPH</b> | 0.39     | o-Xylene                                  | <b>AR</b>    | 1.20     |
| Benzofuran, 2-methyl-                   | <b>FUR</b>   | 0.41     | Benzene, 1-ethyl-3-methyl-                | <b>AR</b>    | 0.93     |
| 1H-Indene, 2,3-dihydro-5-methyl-        | <b>AR</b>    | 0.94     | 1H-Indene, 1-chloro-2,3-dihydro-          | <b>AR</b>    | 1.01     |
| Phenol, 3-methyl-                       | <b>PH</b>    | 0.15     | 2-Methylindene                            | <b>AR</b>    | 1.60     |
| 1H-Indene, 3-methyl-                    | <b>AR</b>    | 1.38     | 1,1'-Biphenyl, 4-ethenyl-                 | <b>AR</b>    | 0.26     |
| 1H-Indene, 1-methyl-                    | <b>AR</b>    | 0.71     | Benzofuran                                | <b>FUR</b>   | 0.46     |
| Azulene                                 | <b>ALI</b>   | 1.37     | Benzofuran, 7-methyl-                     | <b>FUR</b>   | 0.35     |
| Creosol                                 | <b>OxyPH</b> | 0.57     | Benzofuran, 4,7-dimethyl-                 | <b>FUR</b>   | 0.17     |
| 1H-Indene, 1,3-dimethyl-                | <b>AR</b>    | 0.78     | 6-Methoxy-3-methylbenzofuran              | <b>FUR</b>   | 0.07     |
| Naphthalene, 2-methyl-                  | <b>PAH</b>   | 4.39     | Dibenzofuran                              | <b>FUR</b>   | 0.09     |
| 2-Methoxy-4-vinylphenol                 | <b>OxyPH</b> | 0.56     | 9-Anthracenecarbonitrile                  | <b>NIT</b>   | 0.20     |
| Naphthalene, 1-ethyl-                   | <b>PAH</b>   | 0.13     | 11H-Benzo[a]carbazole                     | <b>NIT</b>   | 0.14     |
| Naphthalene, 1,3-dimethyl-              | <b>PAH</b>   | 1.05     | Benzene, 1-(1-butenyl)-4-methoxy-, trans- | <b>OxyAR</b> | 0.12     |
| Phenol, 2-methoxy-5-(1-propenyl)-, (E)- | <b>OxyPH</b> | 0.15     | Phenol, 2-methoxy-4-(1-propenyl)-, (Z)-   | <b>OxyPH</b> | 0.26     |
| Biphenylene                             | <b>AR</b>    | 0.09     | Naphthalene                               | <b>PAH</b>   | 1.56     |
| Phenol, 2-methoxy-4-(1-propenyl)-       | <b>OxyPH</b> | 0.30     | Naphthalene, 2-ethyl-                     | <b>PAH</b>   | 0.23     |
| 1-(4-Hydroxybenzylidene)acetone         | <b>OxyPH</b> | 0.14     | Naphthalene, 2,6-dimethyl-                | <b>PAH</b>   | 1.06     |
| 3(2H)-Benzofuranone, 2,4-dimethyl-      | <b>FUR</b>   | 0.16     | Naphthalene, 2,3-dimethyl-                | <b>PAH</b>   | 0.12     |
| Naphthalene, 1,4,5-trimethyl-           | <b>PAH</b>   | 0.17     | Acenaphthylene                            | <b>PAH</b>   | 0.10     |
| Fluorene                                | <b>PAH</b>   | 1.01     | Acenaphthene                              | <b>PAH</b>   | 0.09     |

|                                              |              |       |                                 |            |      |
|----------------------------------------------|--------------|-------|---------------------------------|------------|------|
| 9H-Fluoren-9-one                             | <b>KET</b>   | 0.23  | Naphthalene, 2-(1-methylethyl)- | <b>PAH</b> | 0.15 |
| Anthracene                                   | <b>PAH</b>   | 4.15  | Phenanthrene, 3-methyl-         | <b>PAH</b> | 0.27 |
| 1H-Cyclopropa[1]phenanthrene, 1a,9b-dihydro- | <b>AR</b>    | 0.23  | Naphthalene, 2-phenyl-          | <b>PAH</b> | 0.26 |
| Anthracene, 9-methyl-                        | <b>PAH</b>   | 0.43  | Fluoranthene                    | <b>PAH</b> | 4.29 |
| Phenanthrene, 2-methyl-                      | <b>PAH</b>   | 0.26  | Pyrene, 1-methyl-               | <b>PAH</b> | 0.41 |
| 4H-Cyclopenta[def]phenanthrene               | <b>PAH</b>   | 0.69  | Pyrene, 4-methyl-               | <b>PAH</b> | 0.12 |
| Anthracene, 1-methyl-                        | <b>PAH</b>   | 0.45  | Triphenylene                    | <b>PAH</b> | 1.60 |
| Phenanthrene, 1-methyl-                      | <b>PAH</b>   | 0.10  | Benz[a]anthracene, 7-methyl-    | <b>PAH</b> | 0.28 |
| Indeno[2,1-a]indene, 5,10-dihydro-           | <b>AR</b>    | 0.48  | 9H-Cyclopenta[a]pyrene          | <b>PAH</b> | 0.08 |
| Cyclopenta(def)phenanthrenone                | <b>OxyAR</b> | 0.25  | Perylene                        | <b>PAH</b> | 0.32 |
| Pyrene                                       | <b>PAH</b>   | 12.14 | 1-Phenyl-1-butene               | <b>PH</b>  | 0.28 |
| Phenaleno[1,9-bc]thiophene                   | <b>SUL</b>   | 0.24  | Phenol, 2-methyl-               | <b>PH</b>  | 0.21 |
| Benzo[b]naphtho[2,3-d]furan                  | <b>FUR</b>   | 2.28  | p-Cresol                        | <b>PH</b>  | 0.09 |
| Indeno(1,2,3-ij)isoquinoline                 | <b>NIT</b>   | 0.30  | Phenol, 2,6-dimethyl-           | <b>PH</b>  | 0.36 |
| Indeno[2,1-b]chromene,                       | <b>AR</b>    | 0.10  |                                 |            |      |
